# Supplementary material
Source: Springer Nature journal article supplement (https://www.springermedizin.de/resource/supplementary/13584_2012_41_MOESM2_ESM.pdf/9676844)

## Females

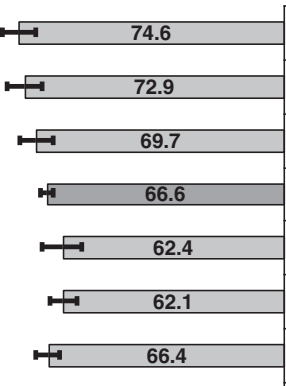

## Males

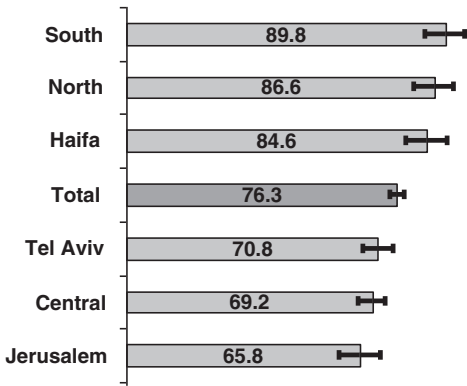

Supplement: MOESM2 [file 9676844]
